# Supplementary material for: An innovative case management intervention for people at high risk of permanent work disability to improve rehabilitation coverage and coordination of health services: a randomized controlled trial (AktiFAME, DRKS00024648)
Source: Springer Nature journal article supplement (doi:10.1186/s12913-022-07482-9), 2022-03-15

## CONSENT

to participate in the scientific study accompanying

**AktiFAME – Active access, counseling and case management for people at high risk of permanent work disability**

.....  
First name

.....  
Name

I was informed about the content and the aim of the AktiFAME study. The AktiFAME study is funded by the German Federal Ministry of Labor and Social Affairs as part of the rehapro federal funding program (<https://www.modellvorhaben-rehapro.de>). The accompanying observational study on the implementation of case management is headed by Prof. Dr. Matthias Bethge from the University of Lübeck. The latter conducts the study and evaluates the data. A leaflet with information on data protection was given to me.

I would like to support the study through my participation and agree to complete the questionnaires that will be handed out to me. There will be no costs for me.

I agree that the data from my case manager's documentation (e.g. time, duration and type of contacts), my questionnaire data, my medical information on participation in AktiFAME (health data), and administrative data from my pension account (employment, sociodemographic data, rehabilitation) will be merged by the researchers using an identification number. I have been assured that no personal data (name, year of birth, contact details) or other information that allows conclusions to be drawn about my person will be passed on to third parties outside the study.

Prof. Dr. Matthias Bethge  
University of Lübeck  
Institute for Social Medicine and  
Epidemiology  
Ratzeburger Allee 160  
23562 Lübeck

T +49 451 500 51280  
F +49 451 500 51204  
M [matthias.bethge@uksh.de](mailto:matthias.bethge@uksh.de)  
[www.aktifame.de](http://www.aktifame.de)

Gefördert durch:

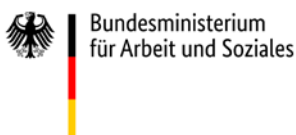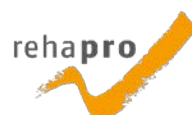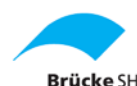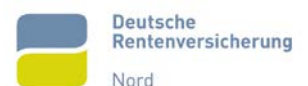

aufgrund eines Beschlusses  
des Deutschen Bundestages

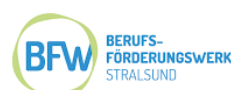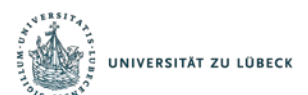

I know that I can withdraw my consent at any time without giving reasons and without disadvantages. I was fully informed about my rights, but also about the time I would spend as a study participant. All my questions were answered to my satisfaction.

Under these conditions, I give my consent to participate in the study.

AktiFAME – Active access, counseling  
and case management for people at  
high risk of permanent work disability

Seite 2 von 2

.....  
Place, Date

.....  
Signature

Prof. Dr. Matthias Bethge  
University of Lübeck  
Institute for Social Medicine and  
Epidemiology  
Ratzeburger Allee 160  
23562 Lübeck

T +49 451 500 51280  
F +49 451 500 51204  
M matthias.bethge@uksh.de  
www.aktifame.de

Gefördert durch:

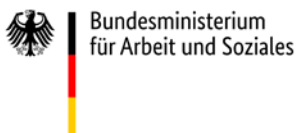

aufgrund eines Beschlusses  
des Deutschen Bundestages

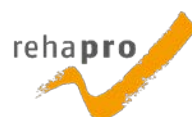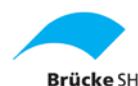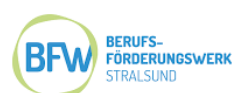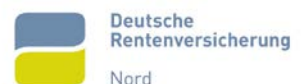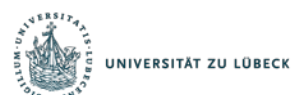

Supplement: MOESM5 [file 20221302]
